# Supplementary figures and images for: Quality improvement tools to manage emergency callbacks from patients with diabetes in a prehospital setting
Source: PubMed Central journal article supplement — BMJ Open Qual. 2023 Jan 4;12(1):e002007. doi: 10.1136/bmjoq-2022-002007 (PMC9815010; doi:10.1136/bmjoq-2022-002007), 2023-01-04

Appendices

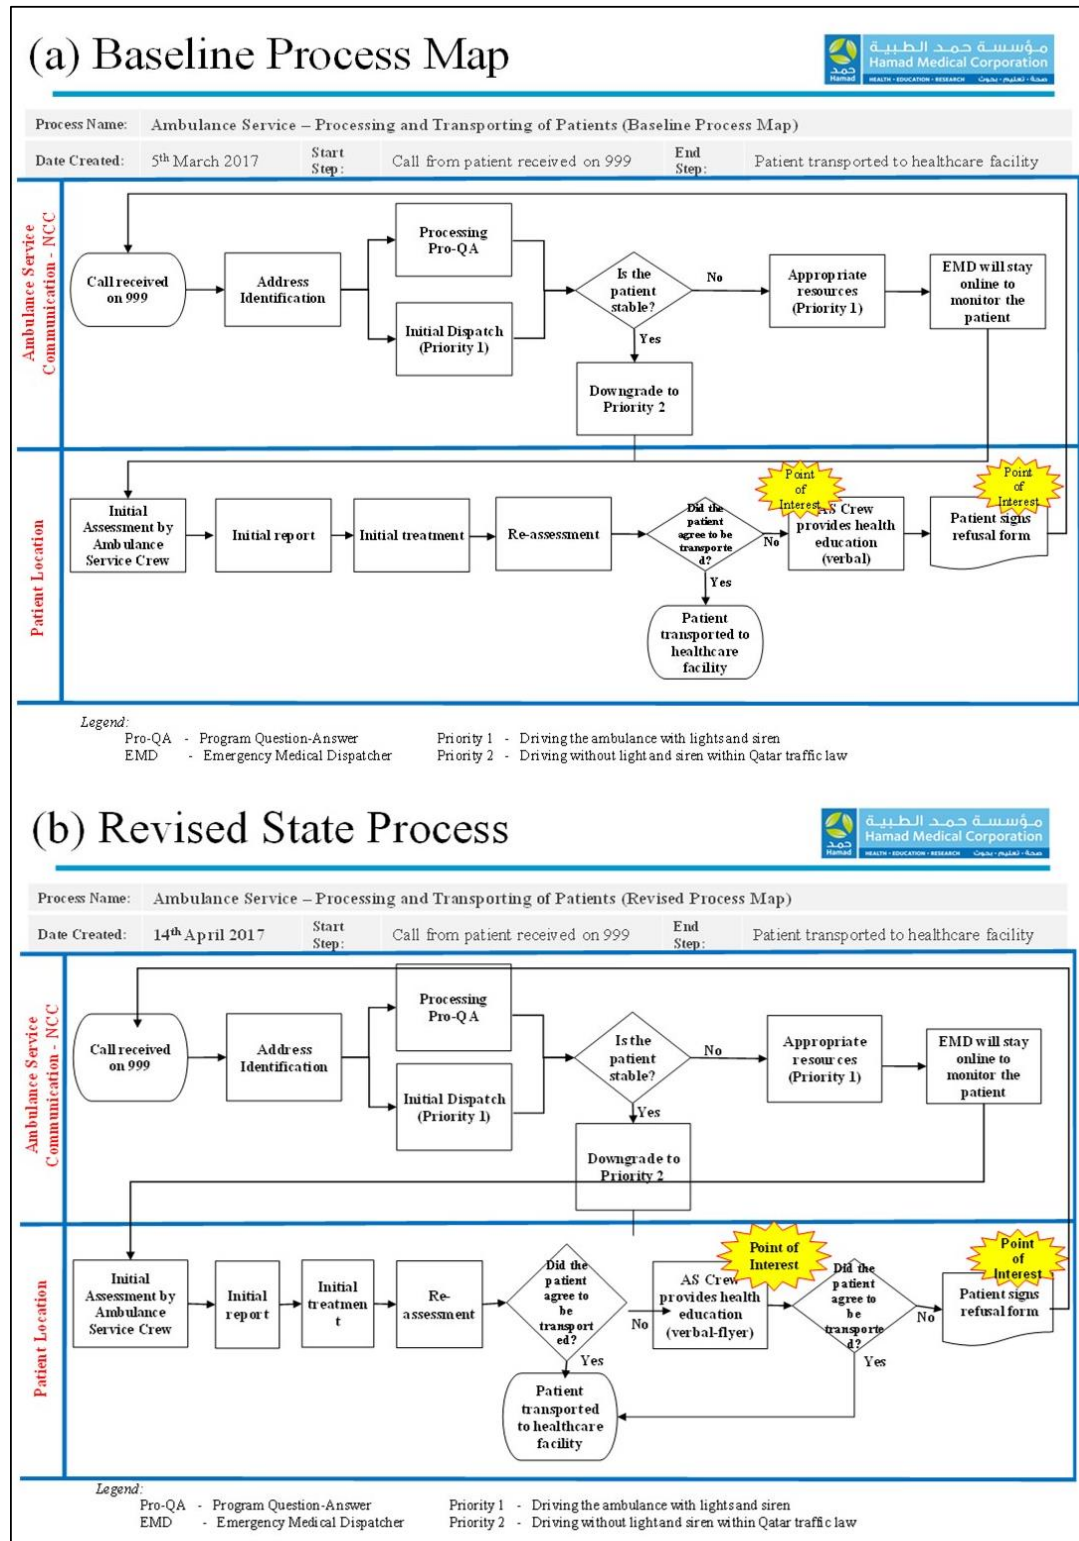

(A). Baseline and revised process maps

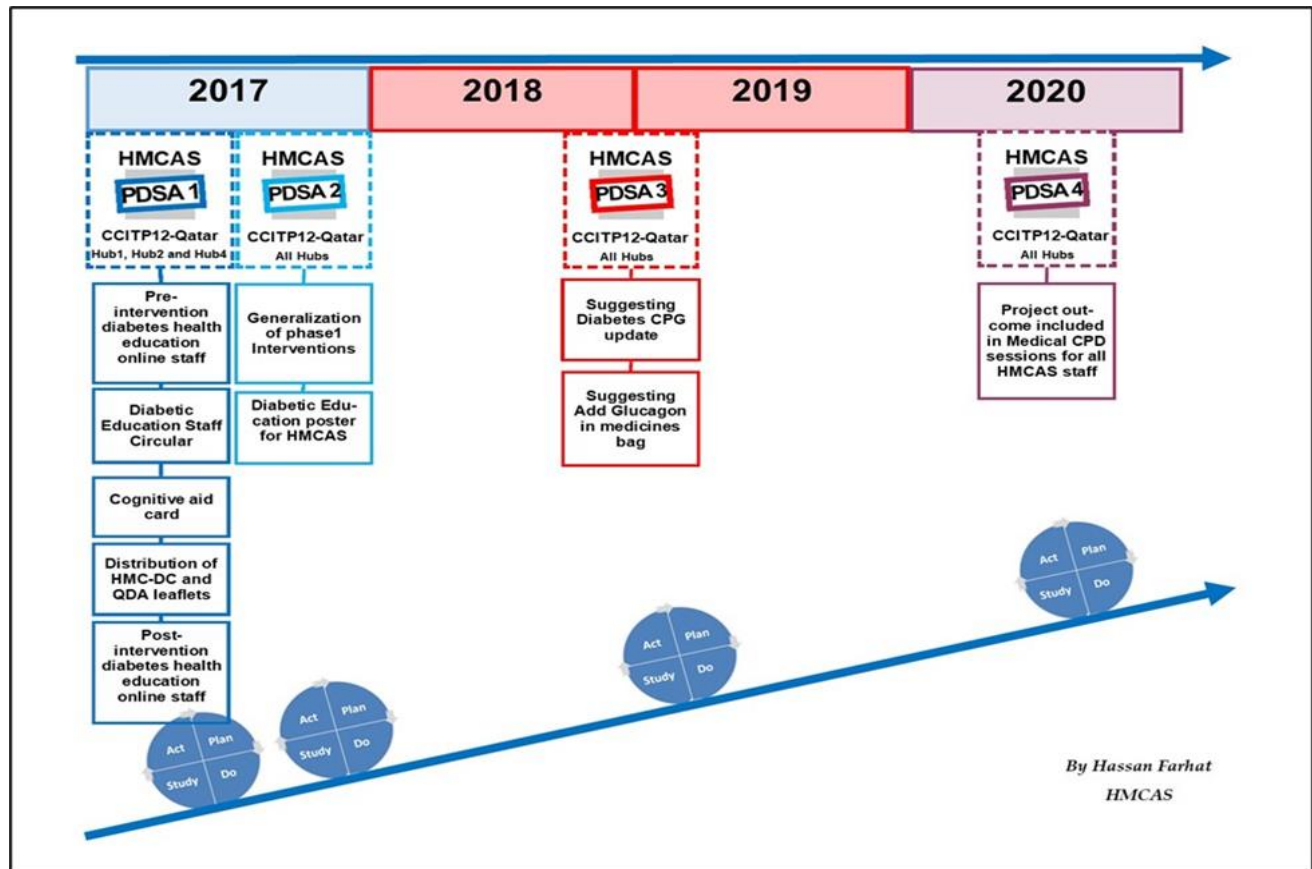

(B). Improvement Ramp PDSA.

Supplement: bmjoq-2022-002007supp001.pdf [file bmjoq-2022-002007supp001.pdf]
